# Supplementary material for: ESEA: Discovering the Dysregulated Pathways based on Edge Set Enrichment Analysis
Source: PubMed Central journal article supplement (PMC4533315; doi:10.1038/srep13044), 2015-08-12
Supplement: srep13044-s1.pdf [file srep13044-s1.pdf]

## Supplementary Information

### ESEA: Discovering the Dysregulated Pathways based on Edge Set Enrichment Analysis

Junwei Han<sup>1,†</sup>, Xinrui Shi<sup>1,†</sup>, Yunpeng Zhang<sup>1,†</sup>, Yanjun Xu<sup>1</sup>, Ying Jiang<sup>3</sup>, Chunlong Zhang<sup>1</sup>, Li Feng<sup>1</sup>, Haixiu Yang<sup>1</sup>, Desi Shang<sup>1</sup>, Zeguo Sun<sup>1</sup>, Fei Su<sup>1</sup>, Chunquan Li<sup>2,\*</sup> and Xia Li<sup>1,\*</sup>

<sup>1</sup> College of Bioinformatics Science and Technology, Harbin Medical University, Harbin, 150081, PR China

<sup>2</sup> School of Medical Informatics, Daqing Campus, Harbin Medical University, Harbin, 150081, PR China

<sup>3</sup> College of Basic Medical Science, Heilongjiang University of Chinese Medicine, Harbin 150040, PR China

\*Correspondence and requests for materials should be addressed to C.L.( lcqbio@163.com) or X.L.( lixia@hrbmu.edu.cn)

†These authors contributed equally to this work

#### Inventory of Supplementary Information

1. Supplementary Figure S1
2. Supplementary Figure S2
3. Supplementary Table S1
4. Supplementary Table S3
5. Supplementary Table S6
6. Supplementary Table S7
7. Supplementary Table S8

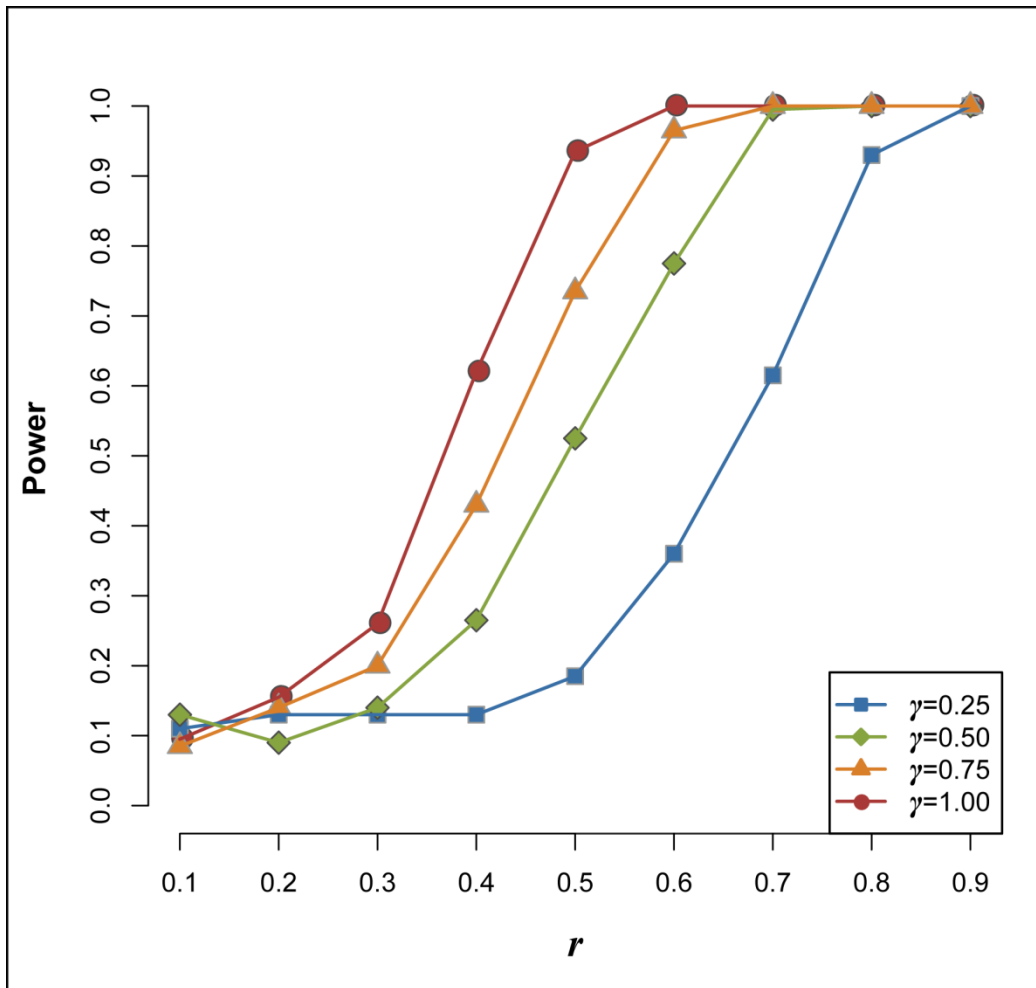

**Figure S1.** Power curves of simulation studies. Power curves of four  $\gamma$  levels ( $\gamma \in \{0.25, 0.50, 0.75, 1.00\}$ ) at different  $r$  levels ( $r \in \{0.1, 0.2, \dots, 0.9\}$ ) in the simulated studies.

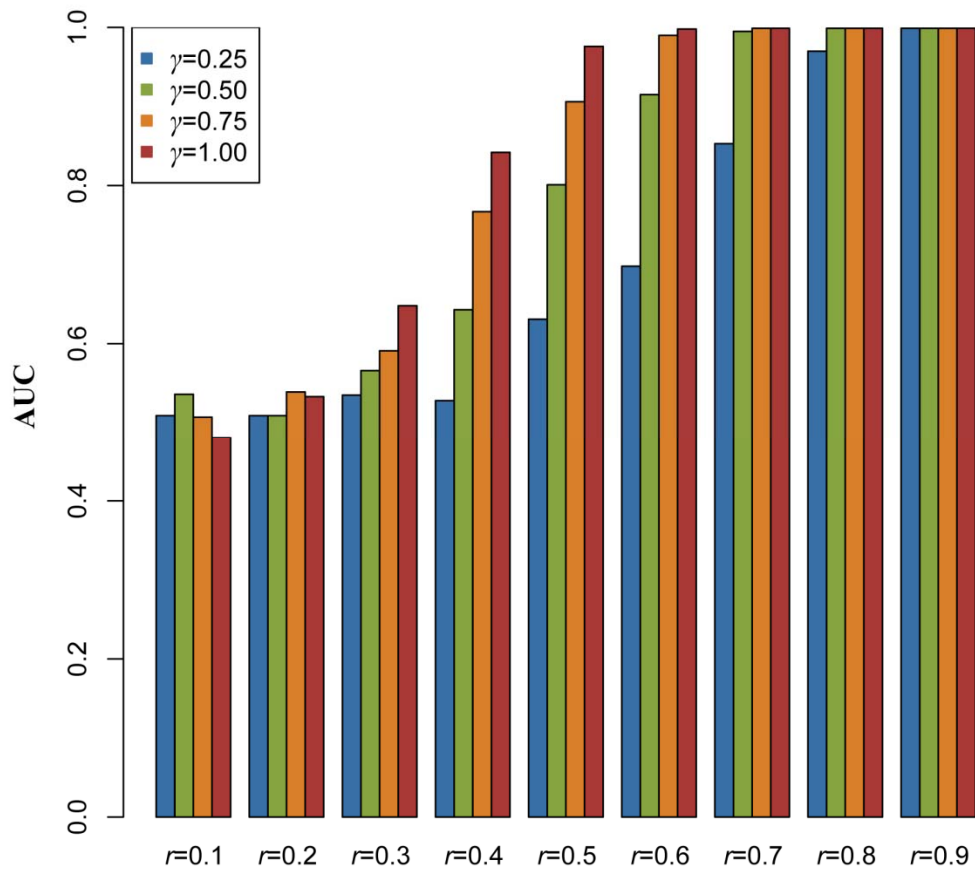

**Figure S2.** Bar chart of Area Under ROC Curve (AUC) for four  $\gamma$  levels ( $\gamma \in \{0.25, 0.50, 0.75, 1.00\}$ ) at different  $r$  levels ( $r \in \{0.1, 0.2, \dots, 0.9\}$ ) in the simulated studies.

**Table S1. Overview of pathways in the seven databases**

| <b>Pathway Database</b> | <b>Pathway Number</b> | <b>Gene Number</b> | <b>Interaction Number</b> |
|-------------------------|-----------------------|--------------------|---------------------------|
| KEGG                    | 236                   | 4694               | 47588                     |
| Reactome                | 1347                  | 6787               | 104606                    |
| Biocarta                | 247                   | 1036               | 5424                      |
| NCI                     | 212                   | 2400               | 14246                     |
| HumanCyc                | 174                   | 600                | 1471                      |
| SPIKE                   | 28                    | 798                | 1521                      |
| Panther                 | 84                    | 1113               | 12148                     |
| Total                   | 2328                  | 8894               | 164826                    |

**Table S3. Detail information for each edge in the colorectal cancer pathway**

| #  | EdgeID       | List Loc | EdgeScore | REES   | CORE_ENRICHMENT |
|----|--------------|----------|-----------|--------|-----------------|
| 1  | MAPK8 RHOA   | 113      | 0.431     | 0.0434 | YES             |
| 2  | AKT1 CASP9   | 518      | 0.351     | 0.0745 | YES             |
| 3  | RAC3 RALGDS  | 726      | 0.333     | 0.106  | YES             |
| 4  | MAPK3 MYC    | 1392     | 0.296     | 0.128  | YES             |
| 5  | AKT2 BAD     | 2018     | 0.273     | 0.148  | YES             |
| 6  | AKT2 GSK3B   | 2098     | 0.27      | 0.175  | YES             |
| 7  | AKT2 PIK3R2  | 3003     | 0.248     | 0.189  | YES             |
| 8  | AKT2 PIK3CB  | 3142     | 0.245     | 0.213  | YES             |
| 9  | CTNNB1 GSK3B | 3256     | 0.243     | 0.236  | YES             |
| 10 | MAPK1 MYC    | 5180     | 0.211     | 0.233  | YES             |
| 11 | CCND1 TCF7L2 | 6138     | 0.199     | 0.241  | YES             |
| 12 | AKT1 GSK3B   | 7899     | 0.179     | 0.236  | YES             |
| 13 | BAX BCL2     | 9373     | 0.165     | 0.233  | YES             |
| 14 | LEF1 MYC     | 9654     | 0.163     | 0.246  | YES             |
| 15 | AKT1 BAD     | 10190    | 0.158     | 0.256  | YES             |
| 16 | AKT3 PIK3CB  | 10330    | 0.157     | 0.27   | YES             |
| 17 | MAP2K1 MAPK3 | 10710    | 0.154     | 0.281  | YES             |
| 18 | SMAD2 SMAD4  | 11311    | 0.148     | 0.289  | YES             |
| 19 | CCND1 MYC    | 11312    | 0.148     | 0.304  | YES             |
| 20 | JUN MAPK3    | 12320    | 0.14      | 0.305  | YES             |
| 21 | AKT3 PIK3R3  | 12822    | 0.137     | 0.313  | YES             |
| 22 | MAPK8 RAC2   | 13503    | 0.132     | 0.317  | YES             |
| 23 | AKT1 PIK3CB  | 14071    | 0.128     | 0.323  | YES             |
| 24 | FOS MAPK3    | 14235    | 0.127     | 0.334  | YES             |
| 25 | AKT3 GSK3B   | 14342    | 0.126     | 0.346  | YES             |
| 26 | CASP9 DCC    | 14357    | 0.126     | 0.359  | YES             |
| 27 | CCND1 TCF7   | 14559    | 0.125     | 0.369  | YES             |
| 28 | CASP3 DCC    | 16189    | 0.114     | 0.359  | NO              |
| 29 | AKT2 PIK3R1  | 18839    | 0.0984    | 0.334  | NO              |
| 30 | BIRC5 LEF1   | 19163    | 0.0966    | 0.34   | NO              |
| 31 | BIRC5 TCF7   | 21347    | 0.0843    | 0.319  | NO              |
| 32 | AKT2 PIK3CD  | 21495    | 0.0835    | 0.326  | NO              |
| 33 | AKT3 PIK3CA  | 22079    | 0.0805    | 0.327  | NO              |
| 34 | AKT3 BAD     | 22183    | 0.08      | 0.334  | NO              |
| 35 | MAPK9 RAC3   | 24116    | 0.0698    | 0.315  | NO              |
| 36 | AKT2 CASP9   | 24868    | 0.0662    | 0.312  | NO              |
| 37 | MAPK9 RAC2   | 26715    | 0.0568    | 0.293  | NO              |
| 38 | CTNNB1 LEF1  | 27908    | 0.0512    | 0.282  | NO              |
| 39 | AKT1 PIK3CA  | 28106    | 0.0502    | 0.285  | NO              |
| 40 | MAPK10 RAC2  | 28657    | 0.0476    | 0.283  | NO              |
| 41 | MAP2K1 RAF1  | 28856    | 0.0467    | 0.285  | NO              |

|    |               |       |         |          |    |
|----|---------------|-------|---------|----------|----|
| 42 | AKT3 CASP9    | 29020 | 0.0459  | 0.287    | NO |
| 43 | SMAD3 TGFB1   | 32055 | 0.0314  | 0.25     | NO |
| 44 | MYC TCF7      | 32966 | 0.027   | 0.241    | NO |
| 45 | MAPK9 RAC1    | 33192 | 0.0259  | 0.241    | NO |
| 46 | CASP3 CASP9   | 33212 | 0.0258  | 0.243    | NO |
| 47 | MAPK10 RAC3   | 34249 | 0.021   | 0.231    | NO |
| 48 | AKT3 PIK3R2   | 34980 | 0.0175  | 0.223    | NO |
| 49 | SMAD3 SMAD4   | 35554 | 0.0148  | 0.217    | NO |
| 50 | AKT1 PIK3CD   | 38148 | 0.00249 | 0.183    | NO |
| 51 | AKT1 PIK3R2   | 41509 | -0.014  | 0.139    | NO |
| 52 | AKT3 PIK3CG   | 42250 | -0.0175 | 0.131    | NO |
| 53 | MYC TCF7L2    | 42568 | -0.0191 | 0.129    | NO |
| 54 | JUN MAPK1     | 42915 | -0.0208 | 0.127    | NO |
| 55 | RALGDS RHOA   | 43468 | -0.0234 | 0.122    | NO |
| 56 | MAPK10 RHOA   | 43514 | -0.0236 | 0.124    | NO |
| 57 | AKT1 PIK3R3   | 44189 | -0.027  | 0.117    | NO |
| 58 | MAPK8 RAC3    | 44541 | -0.0289 | 0.116    | NO |
| 59 | RAC1 RALGDS   | 46004 | -0.036  | 0.0999   | NO |
| 60 | CTNFB1 TCF7   | 46898 | -0.0406 | 0.0922   | NO |
| 61 | AKT3 PIK3CD   | 47836 | -0.0457 | 0.0844   | NO |
| 62 | SMAD2 TGFB1   | 48817 | -0.0508 | 0.0766   | NO |
| 63 | CCND1 LEF1    | 50876 | -0.062  | 0.0555   | NO |
| 64 | AKT2 PIK3CG   | 55672 | -0.0898 | 0.000774 | NO |
| 65 | MAPK9 RHOA    | 56361 | -0.094  | 0.00136  | NO |
| 66 | CTNFB1 TCF7L2 | 56375 | -0.0941 | 0.011    | NO |
| 67 | FOS MAPK1     | 56616 | -0.0957 | 0.0177   | NO |
| 68 | CCND1 FOS     | 56976 | -0.0981 | 0.0231   | NO |
| 69 | BIRC5 TCF7L2  | 57556 | -0.102  | 0.026    | NO |
| 70 | AKT1 PIK3CG   | 57846 | -0.104  | 0.0329   | NO |
| 71 | BRAF MAP2K1   | 59757 | -0.117  | 0.0195   | NO |
| 72 | MAPK8 RAC1    | 61344 | -0.129  | 0.0117   | NO |
| 73 | MAPK10 RAC1   | 63787 | -0.15   | -0.00533 | NO |
| 74 | RAC2 RALGDS   | 64036 | -0.152  | 0.00719  | NO |
| 75 | CCND1 JUN     | 66113 | -0.174  | -0.00245 | NO |
| 76 | AKT3 PIK3R1   | 68374 | -0.202  | -0.0117  | NO |
| 77 | AKT1 PIK3R1   | 68810 | -0.208  | 0.00419  | NO |
| 78 | MAP2K1 MAPK1  | 69404 | -0.217  | 0.0189   | NO |
| 79 | AKT2 PIK3R3   | 70557 | -0.239  | 0.0283   | NO |
| 80 | AKT2 PIK3CA   | 72425 | -0.286  | 0.0331   | NO |

**Table S6. Detail information for each edge in the downregulation of ERBB2/ERBB3 signaling pathway**

| #  | EdgeID       | List Loc | EdgeScore | REES    | CORE_ENRICHMENT |
|----|--------------|----------|-----------|---------|-----------------|
| 1  | NRG2 UBA52   | 97262    | -0.498    | 0.00116 | YES             |
| 2  | ERBB3 NRG2   | 97204    | -0.474    | -0.112  | YES             |
| 3  | ERBB2 UBB    | 96233    | -0.35     | -0.21   | YES             |
| 4  | ERBB2 NRG1   | 95060    | -0.297    | -0.277  | YES             |
| 5  | UBA52 USP8   | 95006    | -0.296    | -0.344  | YES             |
| 6  | ERBB3 UBB    | 94591    | -0.284    | -0.407  | YES             |
| 7  | NRG2 RPS27A  | 93079    | -0.252    | -0.456  | YES             |
| 8  | NRG2 UBB     | 92779    | -0.247    | -0.511  | YES             |
| 9  | RNF41 UBB    | 92450    | -0.241    | -0.564  | YES             |
| 10 | ERBB3 UBA52  | 86140    | -0.17     | -0.554  | NO              |
| 11 | ERBB2 UBA52  | 78647    | -0.122    | -0.515  | NO              |
| 12 | NRG1 UBA52   | 77586    | -0.116    | -0.532  | NO              |
| 13 | ERBB2 NRG2   | 71766    | -0.0877   | -0.499  | NO              |
| 14 | RNF41 USP8   | 70705    | -0.0828   | -0.508  | NO              |
| 15 | ERBB3 RNF41  | 64830    | -0.0581   | -0.466  | NO              |
| 16 | NRG1 RNF41   | 64508    | -0.0568   | -0.476  | NO              |
| 17 | AKT2 USP8    | 64462    | -0.0567   | -0.489  | NO              |
| 18 | ERBB2 ERBB3  | 58939    | -0.0359   | -0.445  | NO              |
| 19 | NRG1 UBB     | 50588    | -0.00569  | -0.367  | NO              |
| 20 | AKT3 USP8    | 45773    | 0.011     | -0.319  | NO              |
| 21 | RNF41 UBA52  | 44005    | 0.017     | -0.303  | NO              |
| 22 | NRG2 RNF41   | 40577    | 0.0287    | -0.272  | NO              |
| 23 | ERBB2 RNF41  | 40099    | 0.0306    | -0.274  | NO              |
| 24 | RNF41 RPS27A | 39210    | 0.0337    | -0.272  | NO              |
| 25 | ERBB3 RPS27A | 38213    | 0.0373    | -0.269  | NO              |
| 26 | NRG1 RPS27A  | 33015    | 0.057     | -0.224  | NO              |
| 27 | AKT1 USP8    | 31753    | 0.0619    | -0.224  | NO              |
| 28 | UBB USP8     | 25363    | 0.0882    | -0.173  | NO              |
| 29 | ERBB2 RPS27A | 24262    | 0.0931    | -0.181  | NO              |
| 30 | ERBB3 NRG1   | 24210    | 0.0934    | -0.202  | NO              |
| 31 | RPS27A USP8  | 20198    | 0.112     | -0.182  | NO              |

**Table S7 Pathways identified by six methods (DAVID, GSEA, SPIA, PWEA, PathNet, ESEA) in the p53 mutation dataset.**

| PathwayName                        | David | GSEA | SPIA | PWEA | PathNet | ESEA |
|------------------------------------|-------|------|------|------|---------|------|
| Cysteine and methionine metabolism |       |      |      |      |         | √    |
| Alcoholism                         |       |      |      |      |         | √    |
| Dilated cardiomyopathy             |       |      |      |      |         | √    |
| ECM-receptor interaction           |       |      |      |      |         | √    |
| Colorectal cancer                  |       |      |      |      |         | √    |
| Type I diabetes mellitus           | √     |      | √    |      |         |      |
| Graft-versus-host disease          | √     |      | √    |      |         |      |
| N-Glycan biosynthesis              |       | √    |      |      |         |      |
| Folate biosynthesis                |       |      |      | √    |         |      |
| Parkinsons disease                 |       |      |      |      | √       |      |
| PPAR signaling pathway             |       |      |      |      | √       |      |
| Ribosome                           |       |      |      |      | √       |      |
| Alzheimers disease                 |       |      |      |      | √       |      |



**Table S8 Pathways identified by six methods (DAVID, GSEA, SPIA, PWEA, PathNet, ESEA) in the Type 2 diabetes dataset.**

| PathwayName                                  | David | GSEA | SPIA | PWEA | PathNet | ESEA |
|----------------------------------------------|-------|------|------|------|---------|------|
| Circadian entrainment                        |       |      |      |      |         | ✓    |
| Metabolism of xenobiotics by cytochrome P450 |       |      |      |      |         | ✓    |
| Retinol metabolism                           |       |      |      |      |         | ✓    |
| Retrograde endocannabinoid signaling         |       |      |      |      |         | ✓    |
| Terpenoid backbone biosynthesis              |       |      |      |      |         | ✓    |
| Alzheimer's disease                          |       | ✓    |      |      |         |      |
| Huntington's disease                         |       | ✓    |      |      |         |      |
| Nucleotide excision repair                   |       | ✓    |      |      |         |      |
| Oxidative phosphorylation                    |       | ✓    |      |      |         |      |
| Parkinson's disease                          |       | ✓    |      |      |         |      |
| Ribosome                                     |       | ✓    |      |      | ✓       |      |
| Huntingtons disease                          |       |      |      |      | ✓       |      |
| Parkinsons disease                           |       |      |      |      | ✓       |      |
